# Supplementary material
Source: publisher figshare collection journal article supplement (https://frontiersin.figshare.com/ndownloader/files/13675544)
Supplement: Supplementary file [file 13675544]

Supplementary Table 1

|        |                                           |                        |                             |                                |                              |                       |                 |
|--------|-------------------------------------------|------------------------|-----------------------------|--------------------------------|------------------------------|-----------------------|-----------------|
| 13-616 | Cognitive impairment<br>Myasthenia gravis | Cardiac<br>dysfunction | Vascular<br>risk factors    | Chronic renal<br>insufficiency | Musculoskeletal<br>pathology | Sensory<br>impairment | Anaemia         |
| 14-723 | Cognitive impairment                      |                        |                             | Chronic renal<br>insufficiency | Musculoskeletal<br>pathology | Sensory<br>impairment |                 |
| 14-724 | Cognitive impairment                      | Cardiac<br>dysfunction | Vascular<br>Risk<br>Factors | Chronic renal<br>insufficiency | Musculoskeletal<br>pathology | Sensory<br>impairment |                 |
| 14-725 | Cognitive impairment                      | Cardiac<br>dysfunction | Vascular<br>Risk<br>Factors |                                | Musculoskeletal<br>pathology | Sensory<br>impairment |                 |
| 14-726 | Polyneuropathy                            |                        |                             |                                | Musculoskeletal<br>pathology | Sensory<br>impairment | Anaemia         |
| 14-727 | Cognitive impairment                      | Cardiac<br>dysfunction | Vascular<br>Risk<br>Factors |                                |                              |                       |                 |
| 14-729 | Cognitive impairment                      |                        | Vascular<br>Risk<br>Factors |                                |                              |                       |                 |
| 14-730 | Cognitive impairment                      | Cardiac<br>dysfunction |                             |                                | Musculoskeletal<br>pathology | Sensory<br>impairment |                 |
| 14-731 | Cognitive impairment<br>Stroke            | Cardiac<br>dysfunction |                             | Chronic renal<br>insufficiency |                              |                       |                 |
| 14-732 | Cognitive impairment<br>Stroke            | Cardiac<br>dysfunction | Vascular<br>Risk<br>Factors |                                | Musculoskeletal<br>pathology | Sensory<br>impairment | Anaemia<br>COPD |
| 14-733 | Cognitive impairment                      |                        | Vascular<br>Risk<br>Factors | Chronic renal<br>insufficiency | Musculoskeletal<br>pathology |                       |                 |

|        |                                |                     |                       |                             |                           |                    |                 |
|--------|--------------------------------|---------------------|-----------------------|-----------------------------|---------------------------|--------------------|-----------------|
| 14-734 | Cognitive impairment           |                     |                       | Chronic renal insufficiency |                           | Sensory impairment |                 |
| 14-736 | Cognitive impairment           | Cardiac dysfunction | Vascular Risk Factors |                             |                           | Sensory impairment | Cancer          |
| 14-737 | Cognitive impairment           |                     |                       |                             | Musculoskeletal pathology | Sensory impairment | Anaemia         |
| 14-738 | Cognitive impairment           | Cardiac dysfunction |                       | Chronic renal insufficiency |                           |                    | Anaemia         |
| 14-739 | Cognitive impairment           | Cardiac dysfunction | Vascular Risk Factors | Chronic renal insufficiency |                           |                    | Anaemia<br>COPD |
| 14-740 | Cognitive impairment           |                     |                       |                             | Musculoskeletal pathology | Sensory impairment |                 |
| 14-741 | Cognitive impairment           | Cardiac dysfunction | Vascular Risk Factors | Chronic renal insufficiency |                           | Sensory impairment |                 |
| 14-780 | Cognitive impairment           | Cardiac dysfunction |                       |                             |                           |                    | Cancer          |
| 14-781 | Cognitive impairment           | Cardiac dysfunction |                       | Chronic renal insufficiency |                           |                    | Hypothyroidism  |
| 14-782 | Cognitive impairment<br>Stroke | Cardiac dysfunction | Vascular Risk Factors |                             | Musculoskeletal pathology | Sensory impairment |                 |
| 14-783 | Cognitive impairment           |                     | Vascular Risk Factors |                             |                           | Sensory impairment |                 |
| 14-784 | Cognitive impairment           |                     | Vascular Risk Factors |                             | Musculoskeletal pathology |                    |                 |

|         |                                    |                     |                       |                             |                           |                    |                |
|---------|------------------------------------|---------------------|-----------------------|-----------------------------|---------------------------|--------------------|----------------|
| 14-785  | Cognitive impairment               |                     |                       |                             |                           |                    |                |
| 14-786  |                                    | Cardiac dysfunction | Vascular Risk Factors | Chronic renal insufficiency |                           | Sensory impairment |                |
| 14-791  | Cognitive impairment<br>Epilepsy   | Cardiac dysfunction |                       |                             |                           |                    |                |
| 14-792  | Hydrocephalus<br>Myelopathy        |                     | Vascular Risk Factors |                             |                           | Sensory impairment | COPD           |
| 14-793  | Cognitive impairment               |                     |                       |                             | Musculoskeletal pathology | Sensory impairment |                |
| 14-794  | Stroke                             |                     |                       |                             |                           | Sensory impairment |                |
| 14-795  | Cognitive impairment               | Cardiac dysfunction | Vascular Risk Factors |                             |                           | Sensory impairment | Hypothyroidism |
| 14-820* | Parkinson's Disease                |                     |                       |                             |                           |                    | Cancer         |
| 14-821  | Cognitive impairment               | Cardiac dysfunction |                       | Chronic renal insufficiency |                           |                    | Anaemia        |
| 14-822  |                                    | Cardiac dysfunction |                       | Chronic renal insufficiency |                           | Sensory impairment |                |
| 14-823  |                                    | Cardiac dysfunction | Vascular Risk Factors |                             |                           |                    | Cancer         |
| 14-824  | Cognitive impairment<br>Myelopathy |                     |                       | Chronic renal insufficiency |                           |                    | COPD           |
| 09-1045 | Parkinson's Disease                |                     |                       |                             |                           | Sensory impairment |                |
| 10-953  | Cognitive impairment               |                     | Vascular              | Chronic renal               |                           | Sensory            | Anaemia        |

|        |                                             |                        |                 |               |  |            |                |
|--------|---------------------------------------------|------------------------|-----------------|---------------|--|------------|----------------|
|        |                                             |                        | Risk<br>Factors | insufficiency |  | impairment |                |
| 14-175 | Cognitive impairment<br>Parkinson's Disease | Cardiac<br>dysfunction |                 |               |  |            | COPD<br>Cancer |

Supplementary Table 1: Functionally impaired nonagenarians comorbidity:

- Cardiac dysfunction: arrhythmia, cardiac insufficiency, ischemia, valvulopathy
- Vascular risk factors: high blood pressure, diabetes mellitus, dyslipidaemia
- Musculoskeletal pathology: arthrosis, osteoporosis, rheumatic polymyalgia
- Sensory impairment: vision or hearing loss

\*Patient suffering from leukaemia, with abnormally high telomere values

+Healthy nonagenarians did not present any relevant comorbidity (table not shown)
